# Supplementary material for: High Accuracy Mutation Detection in Leukemia on a Selected Panel of Cancer Genes
Source: PLOS journal article supplement (doi:10.1371/journal.pone.0038463), 2012-06-04

## Figure S2: Low coverage exons have significantly higher GC-content.

Comparing the GC-content of the exons with low and high coverage revealed that the two groups have significantly different GC-content (p-value  $2.2\text{e-}16$ ), with low coverage exons having higher GC-content.

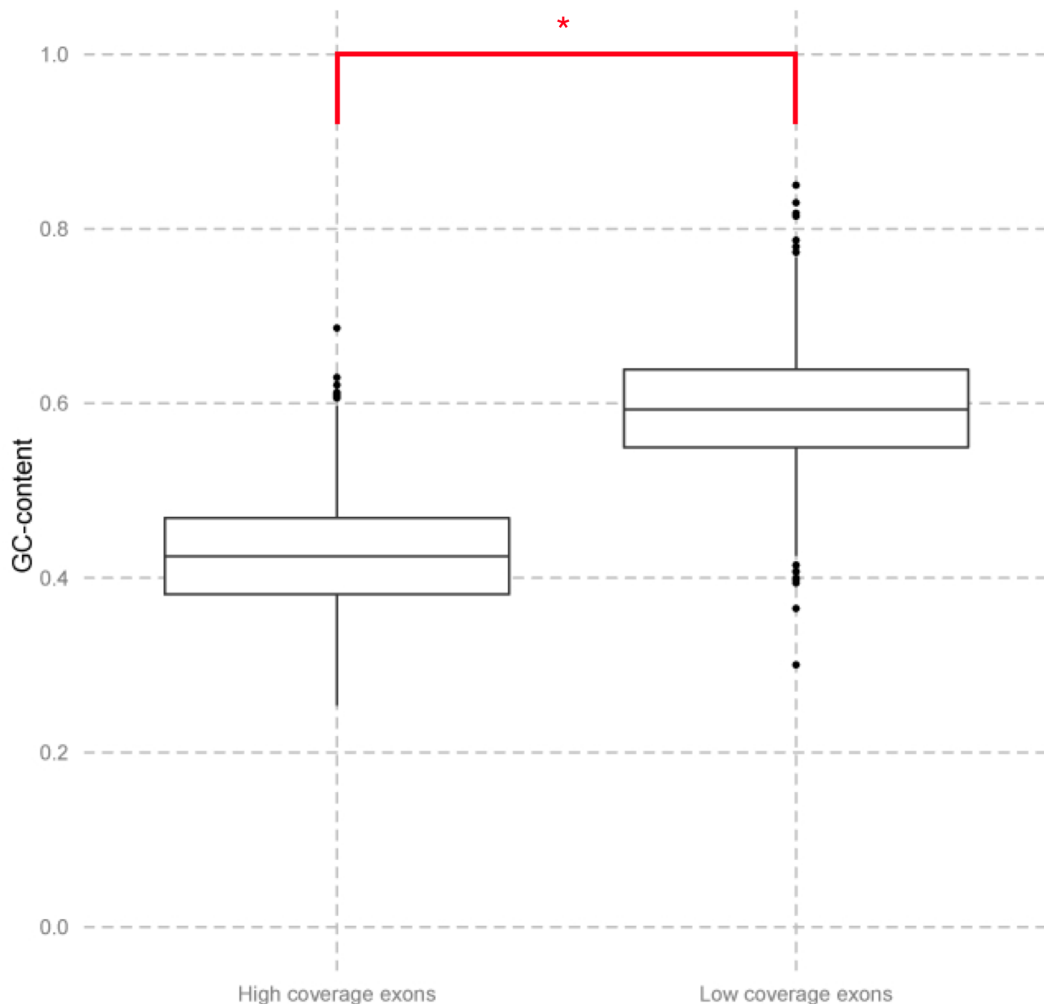

Supplement: S2 (10.1371/journal.pone.0038463.s002) [file journal.pone.0038463.s002]
