# Supplementary material for: High Accuracy Mutation Detection in Leukemia on a Selected Panel of Cancer Genes
Source: PLOS journal article supplement (doi:10.1371/journal.pone.0038463), 2012-06-04

**Figure S4:** Functional classification of the 97 selected genes based on molecular function terms.

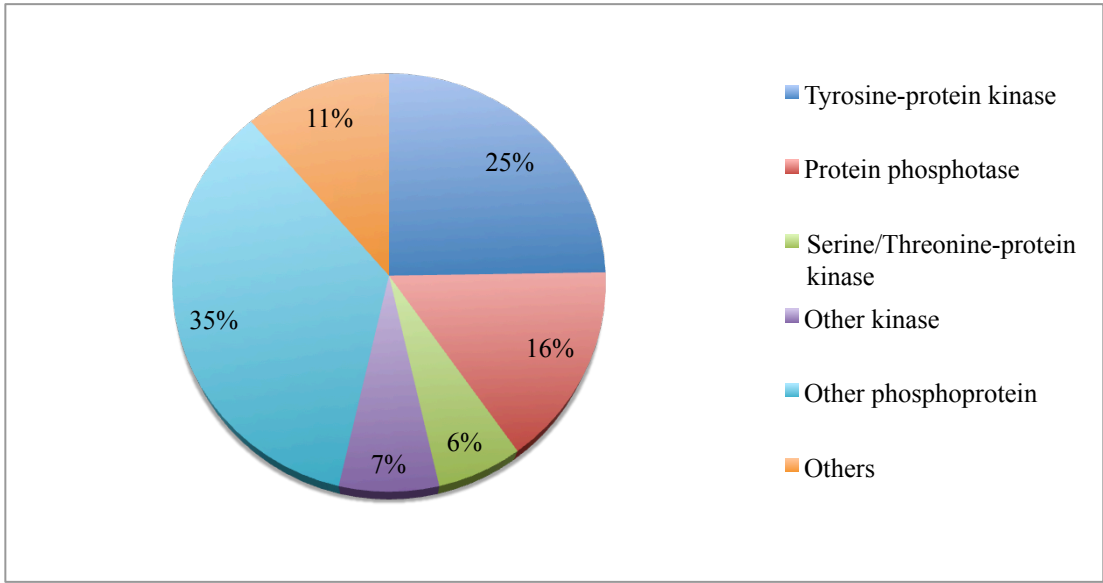

Supplement: S4 (10.1371/journal.pone.0038463.s004) [file journal.pone.0038463.s004]
