# Supplementary material for: High Accuracy Mutation Detection in Leukemia on a Selected Panel of Cancer Genes
Source: PLoS One. 2012 Jun 4;7(6):e38463. doi: 10.1371/journal.pone.0038463 (PMC3366948; doi:10.1371/journal.pone.0038463)
Supplement: Table S2 — Performance of the pipelines under varying parameters. (XLSX) [file pone.0038463.s006.xlsx]

## Sheet: TableS2
Table S2. Performance of the pipelines under varying parameters
Pipeline	DoC	AF	P(SNP|Sj,cj)	MCC	Specificity	sensitivity
blat+atlas-snp2	3	0	0	0.236163	0.114943	0.99187
blat+atlas-snp2	10	0	0	0.0239935	0.172414	0.845528
blat+atlas-snp2	3	0.2	0	0.687813	0.655172	0.97561
blat+atlas-snp2	10	0.2	0	0.546009	0.712644	0.829268
blat+atlas-snp2	3	0.25	0	0.747622	0.758621	0.95935
blat+atlas-snp2	10	0.25	0	0.623217	0.816092	0.813008
blat+atlas-snp2	3	0.3	0	0.784132	0.873563	0.910569
blat+atlas-snp2	10	0.3	0	0.674135	0.91954	0.764228
blat+atlas-snp2	3	0	0.5	0.611092	0.574713	0.96748
blat+atlas-snp2	10	0	0.5	0.441659	0.597701	0.829268
blat+atlas-snp2	3	0.2	0.5	0.793975	0.827586	0.95122
blat+atlas-snp2	10	0.2	0.5	0.655665	0.850575	0.813008
blat+atlas-snp2	3	0.25	0.5	0.803055	0.862069	0.934959
blat+atlas-snp2	10	0.25	0.5	0.671987	0.885057	0.796748
blat+atlas-snp2	3	0.3	0.5	0.798184	0.91954	0.886179
blat+atlas-snp2	10	0.3	0.5	0.682258	0.942529	0.747967
blat+atlas-snp2	3	0	0.9	0.611092	0.574713	0.96748
blat+atlas-snp2	10	0	0.9	0.441659	0.597701	0.829268
blat+atlas-snp2	3	0.2	0.9	0.793975	0.827586	0.95122
blat+atlas-snp2	10	0.2	0.9	0.655665	0.850575	0.813008
blat+atlas-snp2	3	0.25	0.9	0.803055	0.862069	0.934959
blat+atlas-snp2	10	0.25	0.9	0.671987	0.885057	0.796748
blat+atlas-snp2	3	0.3	0.9	0.798184	0.91954	0.886179
blat+atlas-snp2	10	0.3	0.9	0.682258	0.942529	0.747967
blat+varscan	3	0	-	0.407246	0.275862	0.99187
blat+varscan	10	0	-	0.189409	0.344828	0.821138
blat+varscan	3	0.2	-	0.76084	0.747126	0.97561
blat+varscan	10	0.2	-	0.603776	0.804598	0.804878
blat+varscan	3	0.25	-	0.774765	0.804598	0.95122
blat+varscan	10	0.25	-	0.64152	0.862069	0.788618
blat+varscan	3	0.3	-	0.804569	0.896552	0.910569
blat+varscan	10	0.3	-	0.682258	0.942529	0.747967
bwa+picard+atlas	3	0	0	0.122287	0.045977	0.99187
bwa+picard+atlas	10	0	0	-0.0389086	0.149425	0.821138
bwa+picard+atlas	3	0.2	0	0.777391	0.781609	0.96748
bwa+picard+atlas	10	0.2	0	0.627813	0.83908	0.796748
bwa+picard+atlas	3	0.25	0	0.783318	0.83908	0.934959
bwa+picard+atlas	10	0.25	0	0.639702	0.885057	0.764228
bwa+picard+atlas	3	0.3	0	0.756252	0.873563	0.886179
bwa+picard+atlas	10	0.3	0	0.628444	0.91954	0.715447
bwa+picard+atlas	3	0	0.5	0.833221	0.862069	0.95935
bwa+picard+atlas	10	0	0.5	0.68316	0.896552	0.796748
bwa+picard+atlas	3	0.2	0.5	0.862333	0.908046	0.95122
bwa+picard+atlas	10	0.2	0.5	0.720617	0.942529	0.788618
bwa+picard+atlas	3	0.25	0.5	0.834389	0.91954	0.918699
bwa+picard+atlas	10	0.25	0.5	0.701648	0.954023	0.756098
bwa+picard+atlas	3	0.3	0.5	0.780645	0.91954	0.869919
bwa+picard+atlas	10	0.3	0.5	0.65742	0.954023	0.707317
bwa+picard+atlas	3	0	0.9	0.833221	0.862069	0.95935
bwa+picard+atlas	10	0	0.9	0.68316	0.896552	0.796748
bwa+picard+atlas	3	0.2	0.9	0.862333	0.908046	0.95122
bwa+picard+atlas	10	0.2	0.9	0.720617	0.942529	0.788618
bwa+picard+atlas	3	0.25	0.9	0.834389	0.91954	0.918699
bwa+picard+atlas	10	0.25	0.9	0.701648	0.954023	0.756098
bwa+picard+atlas	3	0.3	0.9	0.780645	0.91954	0.869919
bwa+picard+atlas	10	0.3	0.9	0.65742	0.954023	0.707317
bwa+picard+samtools	3	-	-	0.862373	0.896552	0.95935
bwa+picard+samtools	10	-	-	0.717041	0.931034	0.796748
bwa+picard+samtools+varFilter	3	-	-	0.74658	0.91954	0.837398
bwa+picard+samtools+varFilter	10	-	-	0.637912	0.942529	0.699187
bwa+picard+varscan	3	0	-	0.592094	0.517241	0.98374
bwa+picard+varscan	10	0	-	0.379795	0.551724	0.813008
bwa+picard+varscan	3	0.20	-	0.749454	0.747126	0.96748
bwa+picard+varscan	10	0.20	-	0.654787	0.908046	0.756098
bwa+picard+varscan	3	0.25	-	0.793975	0.827586	0.95122
bwa+picard+varscan	10	0.25	-	0.662867	0.931034	0.739837
bwa+picard+varscan	3	0.30	-	0.766665	0.885057	0.886179
bwa+picard+varscan	10	0.30	-	0.62882	0.954023	0.674797
bwa+ssaha+picard+atlas	3	0	0	0.220482	0.103448	0.99187
bwa+ssaha+picard+atlas	10	0	0	0.0209523	0.195402	0.821138
bwa+ssaha+picard+atlas	3	0.2	0	0.805552	0.816092	0.96748
bwa+ssaha+picard+atlas	10	0.2	0	0.649801	0.862069	0.796748
bwa+ssaha+picard+atlas	3	0.25	0	0.832952	0.896552	0.934959
bwa+ssaha+picard+atlas	10	0.25	0	0.685748	0.931034	0.764228
bwa+ssaha+picard+atlas	3	0.3	0	0.787628	0.908046	0.886179
bwa+ssaha+picard+atlas	10	0.3	0	0.652511	0.942529	0.715447
bwa+ssaha+picard+atlas	3	0	0.5	0.862373	0.896552	0.95935
bwa+ssaha+picard+atlas	10	0	0.5	0.705685	0.91954	0.796748
bwa+ssaha+picard+atlas	3	0.2	0.5	0.882254	0.931034	0.95122
bwa+ssaha+picard+atlas	10	0.2	0.5	0.732179	0.954023	0.788618
bwa+ssaha+picard+atlas	3	0.25	0.5	0.855058	0.942529	0.918699
bwa+ssaha+picard+atlas	10	0.25	0.5	0.713558	0.965517	0.756098
bwa+ssaha+picard+atlas	3	0.3	0.5	0.802205	0.942529	0.869919
bwa+ssaha+picard+atlas	10	0.3	0.5	0.669743	0.965517	0.707317
bwa+ssaha+picard+atlas	3	0	0.9	0.862373	0.896552	0.95935
bwa+ssaha+picard+atlas	10	0	0.9	0.705685	0.91954	0.796748
bwa+ssaha+picard+atlas	3	0.2	0.9	0.882254	0.931034	0.95122
bwa+ssaha+picard+atlas	10	0.2	0.9	0.732179	0.954023	0.788618
bwa+ssaha+picard+atlas	3	0.25	0.9	0.855058	0.942529	0.918699
bwa+ssaha+picard+atlas	10	0.25	0.9	0.713558	0.965517	0.756098
bwa+ssaha+picard+atlas	3	0.3	0.9	0.802205	0.942529	0.869919
bwa+ssaha+picard+atlas	10	0.3	0.9	0.669743	0.965517	0.707317
Roche	-	-	-	0.824131	0.908046	0.918699
ssaha+picard+atlas	3	0	0.9	0.862756	0.885057	0.96748
ssaha+picard+atlas	10	0	0.9	0.702498	0.908046	0.804878
ssaha+picard+atlas	3	0.2	0.9	0.882028	0.91954	0.95935
ssaha+picard+atlas	10	0.2	0.9	0.728465	0.942529	0.796748
ssaha+picard+atlas	3	0.25	0.9	0.863255	0.931034	0.934959
ssaha+picard+atlas	10	0.25	0.9	0.716799	0.954023	0.772358
ssaha+picard+atlas	3	0.3	0.9	0.819456	0.942529	0.886179
ssaha+picard+atlas	10	0.3	0.9	0.684157	0.965517	0.723577
ssaha+picard+atlas	3	0	0.5	0.862756	0.885057	0.96748
ssaha+picard+atlas	10	0	0.5	0.702498	0.908046	0.804878
ssaha+picard+atlas	3	0.2	0.5	0.882028	0.91954	0.95935
ssaha+picard+atlas	10	0.2	0.5	0.728465	0.942529	0.796748
ssaha+picard+atlas	3	0.25	0.5	0.863255	0.931034	0.934959
ssaha+picard+atlas	10	0.25	0.5	0.716799	0.954023	0.772358
ssaha+picard+atlas	3	0.3	0.5	0.819456	0.942529	0.886179
ssaha+picard+atlas	10	0.3	0.5	0.684157	0.965517	0.723577
ssaha+picard+atlas	3	0	0	0.236626	0.091954	1
ssaha+picard+atlas	10	0	0	0.0170366	0.183908	0.829268
ssaha+picard+atlas	3	0.2	0	0.808926	0.793103	0.98374
ssaha+picard+atlas	10	0.2	0	0.644808	0.83908	0.813008
ssaha+picard+atlas	3	0.25	0	0.852613	0.885057	0.95935
ssaha+picard+atlas	10	0.25	0	0.697707	0.91954	0.788618
ssaha+picard+atlas	3	0.3	0	0.814854	0.908046	0.910569
ssaha+picard+atlas	10	0.3	0	0.674748	0.942529	0.739837
ssaha+picard+samtools	3	-	-	0.872177	0.908046	0.95935
ssaha+picard+samtools+varFilter	3	-	-	0.738259	0.91954	0.829268
ssaha+picard+samtools	10	-	-	0.717041	0.931034	0.796748
ssaha+picard+samtools+varFilter	10	-	-	0.637912	0.942529	0.699187
ssaha+picard+varscan	3	0.3	-	0.764508	0.862069	0.902439
ssaha+picard+varscan	10	0.3	-	0.608325	0.885057	0.731707
ssaha+picard+varscan	3	0.25	-	0.794881	0.816092	0.95935
ssaha+picard+varscan	10	0.25	-	0.630446	0.850575	0.788618
ssaha+picard+varscan	3	0.2	-	0.770035	0.758621	0.97561
ssaha+picard+varscan	10	0.2	-	0.593015	0.793103	0.804878
ssaha+picard+varscan	3	0	-	0.597392	0.505747	0.99187
ssaha+picard+varscan	10	0	-	0.37899	0.54023	0.821138
