# Supplementary material for: High Accuracy Mutation Detection in Leukemia on a Selected Panel of Cancer Genes
Source: PLoS One. 2012 Jun 4;7(6):e38463. doi: 10.1371/journal.pone.0038463 (PMC3366948; doi:10.1371/journal.pone.0038463)
Supplement: Table S4 — Point mutations from the Cancer Cell Line project and their detection status by different analysis pipelines. (XLSX) [file pone.0038463.s008.xlsx]

## Sheet: TableS4
Table S4. Point mutations from the Cancer Cell Line project and their detection status by different analysis pipelines
Chr	Position (hg19)	Sample	Gene	BWA-SW + SSAHA2 +Atlas-SNP2 pipeline	ROCHE
chr17	7578442	BE-13	TP53	1	1
chr9	139399344	BE-13	NOTCH1	1	1
chr12	25398284	CCRF-CEM	KRAS	1	1
chr13	28608087	CCRF-CEM	FLT3	1	1
chr17	7578406	CCRF-CEM	TP53	1	1
chr17	7577538	CCRF-CEM	TP53	1	1
chr4	153249385	CCRF-CEM	FBXW7	1	1
chr13	28592653	CTV1	FLT3	1	1
chr4	153247289	CTV1	FBXW7	1	1
chr9	139390623	CTV1	NOTCH1	0	0
chr10	89720852	KARPAS45	PTEN	1	1
chr17	7578406	KARPAS45	TP53	1	1
chr17	7577121	KARPAS45	TP53	1	1
chr2	48027431	KARPAS45	MSH6	1	1
chr2	48026605	KARPAS45	MSH6	1	1
chr4	153247289	KARPAS45	FBXW7	1	1
chr9	139397675	KARPAS45	NOTCH1	0	0
chr1	115258747	KE37	NRAS	1	1
chr9	139390816	KE37	NOTCH1	0	0
chr17	7577124	LOUCY	TP53	1	1
chr17	7578457	MOTL16	TP53	1	1
chr1	115258747	P12ichikawa	NRAS	1	1
chr10	89720670	P12ichikawa	PTEN	1	1
chr17	7577538	P12ichikawa	TP53	1	1
chr4	153247289	P12ichikawa	FBXW7	1	1
chr10	89692993	RPMI	PTEN	1	1
chr17	7577121	RPMI	TP53	1	1
chr4	153249384	RPMI	FBXW7	1	1
chr17	7577120	SUPT1	TP53	1	1
chr17	7577138	SUPT1	TP53	1	1
chr17	7577538	SUPT1	TP53	1	1
chr3	178936093	SUPT1	PIK3CA	1	0
chr1	115258747	TALL1	NRAS	1	1
chr17	7577538	TALL1	TP53	0	0
chr17	7577548	TALL1	TP53	1	1
