# Supplementary material for: High Accuracy Mutation Detection in Leukemia on a Selected Panel of Cancer Genes
Source: PLoS One. 2012 Jun 4;7(6):e38463. doi: 10.1371/journal.pone.0038463 (PMC3366948; doi:10.1371/journal.pone.0038463)
Supplement: Table S5 — Sanger confirmed variants in JAK genes. (XLSX) [file pone.0038463.s009.xlsx]

## Sheet: TableS5
Table S5. Sanger confirmed variants in JAK genes.
Sample	JAK gene	nucleotide change (cDNA)	# reads	% mutant reads	AA change	Protein domain	SIFT	Conserved	Somatic	COSMIC
TLE46 (T-ALL)	JAK2	A2681G	21	0.57	D894G	Kinase	0.01	yes	no	-
TLE64 (T-ALL)	JAK2	A3323G	N/A	N/A	N1108S	Kinase	0.51	yes	no	33708
KARPAS45	JAK3	G751A	16	0.69	A251T	FERM	1	no	N/A	-
SUPT1	JAK3	G815A	18	0.44	R272H	FERM	0.16	yes	N/A	-
SUPT1	JAK3	G1208A	8	0.38	R403H	SH2	0.13	yes	N/A	-
TLE44 (T-ALL)	JAK3	G1533A	9	0.44	M511I	Pseudokinase	0.11	yes	yes	51374
TLE34 (T-ALL)	JAK3	T2021C	N/A	N/A	V674A	Pseudokinase	0.01	yes	yes	-
TLE44 (T-ALL)	JAK3	G1714A	N/A	N/A	A572T	Pseudokinase	0	yes	yes	-
CCRF-CEM	TYK2	G3080A	22	0.55	R1027H	Kinase	0	yes	N/A	-
CCRF-CEM	TYK2	C104T	20	0.6	A35V	FERM	0.12	no	N/A	-
KARPAS45	TYK2	C2488T	17	0.35	Q830*	Pseudokinase	0.76	yes	N/A	-
SUPT1	TYK2	C1124T	18	0.39	A375V	FERM	0.2	no	N/A	-
DND41	TYK2	C1480T	13	0.23	P494S	SH2	0.86	no	N/A	-
JURKAT	TYK2	G575A	11	0.55	C192Y	FERM	0.03	yes	N/A	-
TALL1	TYK2	T2863C	11	0.36	Y955H	Kinase	0.07	yes	N/A	-
CTV1	TYK2	G2810C	52	0.25	G937A	kinase	0.04	no	N/A	-
TLE10 (T-ALL)	TYK2	T44C	N/A	N/A	V15A	-	0.73	no	no	-
TLE90 (T-ALL)	TYK2	G821A	N/A	N/A	R274H	FERM	0.13	no	N/A	-
AML10 (AML)	TYK2	C727T	N/A	N/A	R243W	FERM	0	no	N/A	-
Variants for which no read # and % mutant reads are reported were identified by supplemental Sanger sequencing. Conservation was
assessed by means of the region based conservation score across 46 species (mce46way 30). Somatic status was tested by Sanger
sequencing of a sample of the patient at remission, if available. In case a variant has been described in COSMIC before, the COSMIC
mutation identifier is reported.
