# Supplementary material for: High Accuracy Mutation Detection in Leukemia on a Selected Panel of Cancer Genes
Source: PLoS One. 2012 Jun 4;7(6):e38463. doi: 10.1371/journal.pone.0038463 (PMC3366948; doi:10.1371/journal.pone.0038463)
Supplement: Table S7 — Sanger confirmed mutations in SPRY genes. (XLSX) [file pone.0038463.s011.xlsx]

## Sheet: TableS7
Table S7. Sanger confirmed mutations in SPRY genes.
Sample	Gene	nucleotide change (cDNA)	# reads	% mutant reads	AA change	SIFT	Conserved	Somatically acquired?	COSMIC
TLE43	SPRY3	G785T	22	59	C262F	0	yes	no	-
KARPAS45	SPRY4	T338A	20	50	I113N	0	yes	N/A	-
TLE43	SPRY4	G349A	8	63	G117R	0	yes	yes	-
SUPT1	SPRY4	C142T	7	57	R48W	0	yes	N/A	-
Variants for which no read # and % mutant reads are reported were identified by supplemental Sanger sequencing. Conservation was
assessed by means of the region based conservation score across 46 species (mce46way 30). Somatic status was tested by Sanger
sequencing of a sample of the patient at remission, if available. In case a variant has been described in COSMIC before, the COSMIC
mutation identifier is reported.
