# Supplementary material for: High Accuracy Mutation Detection in Leukemia on a Selected Panel of Cancer Genes
Source: PLoS One. 2012 Jun 4;7(6):e38463. doi: 10.1371/journal.pone.0038463 (PMC3366948; doi:10.1371/journal.pone.0038463)
Supplement: Table S8 — Top 20 enriched (a) molecular function and (b) biological process GO terms from 97 genes. (XLSX) [file pone.0038463.s012.xlsx]

## Sheet: TableS8
Table S8. Top 20 enriched (a) molecular function and (b) biological process GO terms from 97 genes.
a) Top 20 biological processes enriched in target genes
GO_BP	Count	%	P-Value	Corrected p-value (B-H)
phosphorus metabolic process	51	52.6	1.3E-32	2.0E-29
phosphate metabolic process	51	52.6	1.3E-32	2.0E-29
enzyme linked receptor protein signaling pathway	31	32.0	2.4E-25	1.9E-22
transmembrane receptor protein tyrosine kinase signaling pathway	27	27.8	4.4E-25	2.3E-22
protein amino acid phosphorylation	36	37.1	3.3E-22	1.3E-19
regulation of cell proliferation	38	39.2	6.5E-22	2.0E-19
phosphorylation	38	39.2	1.1E-21	3.0E-19
regulation of phosphorylation	28	28.9	4.5E-18	1.0E-15
regulation of protein kinase activity	25	25.8	7.0E-18	1.4E-15
regulation of phosphorus metabolic process	28	28.9	1.2E-17	2.2E-15
regulation of phosphate metabolic process	28	28.9	1.2E-17	2.2E-15
regulation of kinase activity	25	25.8	1.5E-17	2.4E-15
protein kinase cascade	25	25.8	3.5E-17	4.9E-15
regulation of transferase activity	25	25.8	3.9E-17	5.1E-15
positive regulation of cell proliferation	23	23.7	5.8E-14	7.0E-12
intracellular signaling cascade	36	37.1	1.6E-13	1.8E-11
protein amino acid dephosphorylation	15	15.5	3.5E-13	3.7E-11
regulation of MAP kinase activity	15	15.5	7.9E-13	7.8E-11
cell surface receptor linked signal transduction	42	43.3	1.3E-12	1.2E-10
dephosphorylation	15	15.5	2.7E-12	2.3E-10
b) Top 20 molecular functions enriched in target genes
GO_MF	Count	%	P-Value	Corrected p-value (B-H)
protein tyrosine kinase activity	24	24.7	4.4E-24	1.0E-21
transmembrane receptor protein tyrosine kinase activity	17	17.5	5.8E-21	6.9E-19
protein kinase activity	30	30.9	2.7E-17	2.1E-15
ATP binding	40	41.2	1.3E-14	7.8E-13
adenyl ribonucleotide binding	40	41.2	2.1E-14	9.7E-13
purine nucleoside binding	41	42.3	3.3E-14	1.3E-12
nucleoside binding	41	42.3	4.1E-14	1.4E-12
ribonucleotide binding	43	44.3	1.1E-13	3.2E-12
purine ribonucleotide binding	43	44.3	1.1E-13	3.2E-12
adenyl nucleotide binding	40	41.2	1.1E-13	3.0E-12
protein tyrosine phosphatase activity	14	14.4	2.6E-13	6.0E-12
phosphoprotein phosphatase activity	16	16.5	3.9E-13	8.2E-12
purine nucleotide binding	43	44.3	5.0E-13	9.8E-12
nucleotide binding	43	44.3	9.9E-11	1.8E-9
phosphatase activity	16	16.5	1.5E-10	2.4E-9
kinase binding	14	14.4	2.7E-10	4.3E-9
enzyme binding	20	20.6	2.3E-9	3.3E-8
insulin receptor substrate binding	6	6.2	6.4E-9	8.8E-8
structure-specific DNA binding	11	11.3	5.9E-8	7.7E-7
non-membrane spanning protein tyrosine kinase activity	7	7.2	3.5E-7	4.3E-6
