# Supplementary material for: High Accuracy Mutation Detection in Leukemia on a Selected Panel of Cancer Genes
Source: PLoS One. 2012 Jun 4;7(6):e38463. doi: 10.1371/journal.pone.0038463 (PMC3366948; doi:10.1371/journal.pone.0038463)
Supplement: Table S9 — 97 selected genes for capture and their targeted exons. (XLSX) [file pone.0038463.s013.xlsx]

## Sheet: Table S9
Table S9. 97 selected genes for capture and their targeted exons
Gene name	chr	Start pos. (hg18)	End pos. (hg18)
PIK3CD	chr1	9634261	9634548
PIK3CD	chr1	9674014	9674091
PIK3CD	chr1	9674092	9674296
PIK3CD	chr1	9693009	9693286
PIK3CD	chr1	9698140	9698448
PIK3CD	chr1	9698447	9698758
PIK3CD	chr1	9699025	9699314
PIK3CD	chr1	9699532	9699811
PIK3CD	chr1	9700079	9700357
PIK3CD	chr1	9701293	9701586
PIK3CD	chr1	9702465	9702751
PIK3CD	chr1	9702644	9702944
PIK3CD	chr1	9703130	9703605
PIK3CD	chr1	9703687	9703969
PIK3CD	chr1	9704012	9704291
PIK3CD	chr1	9704306	9704582
PIK3CD	chr1	9704529	9704844
PIK3CD	chr1	9704763	9705071
PIK3CD	chr1	9705029	9705345
PIK3CD	chr1	9705705	9705978
PIK3CD	chr1	9706530	9706814
PIK3CD	chr1	9706845	9707129
PIK3CD	chr1	9707369	9707651
PIK3CD	chr1	9709504	9710029
LCK	chr1	32489347	32489632
LCK	chr1	32512419	32512701
LCK	chr1	32512817	32513097
LCK	chr1	32513045	32513361
LCK	chr1	32513412	32513693
LCK	chr1	32513632	32513933
LCK	chr1	32514086	32514299
LCK	chr1	32514455	32514721
LCK	chr1	32514701	32515024
LCK	chr1	32517747	32518029
LCK	chr1	32517921	32518237
LCK	chr1	32518159	32518467
LCK	chr1	32523656	32524391
MPL	chr1	43575973	43576257
MPL	chr1	43576272	43576560
MPL	chr1	43576742	43577023
MPL	chr1	43577482	43577858
MPL	chr1	43578152	43578436
MPL	chr1	43578558	43578841
MPL	chr1	43584646	43584924
MPL	chr1	43584970	43585256
MPL	chr1	43587030	43587314
MPL	chr1	43587418	43587705
MPL	chr1	43590368	43590653
MPL	chr1	43590729	43591536
JAK1	chr1	65071443	65072957
JAK1	chr1	65073571	65073852
JAK1	chr1	65074281	65074562
JAK1	chr1	65076138	65076421
JAK1	chr1	65076652	65076922
JAK1	chr1	65077824	65078105
JAK1	chr1	65079417	65079699
JAK1	chr1	65079612	65079928
JAK1	chr1	65082260	65082545
JAK1	chr1	65082942	65083223
JAK1	chr1	65083701	65083983
JAK1	chr1	65084817	65085096
JAK1	chr1	65085769	65086010
JAK1	chr1	65088982	65089266
JAK1	chr1	65093729	65094005
JAK1	chr1	65095843	65096121
JAK1	chr1	65098305	65098585
JAK1	chr1	65103004	65103275
JAK1	chr1	65105088	65105513
JAK1	chr1	65107513	65107795
JAK1	chr1	65111572	65111850
JAK1	chr1	65117207	65117491
JAK1	chr1	65121498	65121784
JAK1	chr1	65124421	65124706
JAK1	chr1	65204544	65204829
NRAS	chr1	115050950	115052219
NRAS	chr1	115052127	115052454
NRAS	chr1	115052590	115052822
NRAS	chr1	115053642	115053923
NRAS	chr1	115057887	115058158
NRAS	chr1	115060109	115060388
NRAS	chr1	115060755	115061069
PTPRC	chr1	196874679	196874906
PTPRC	chr1	196874901	196875125
PTPRC	chr1	196927961	196928233
PTPRC	chr1	196932412	196932696
PTPRC	chr1	196935235	196935520
PTPRC	chr1	196938060	196938348
PTPRC	chr1	196938936	196939219
PTPRC	chr1	196940088	196940368
PTPRC	chr1	196942440	196942737
PTPRC	chr1	196943798	196944081
PTPRC	chr1	196945357	196945636
PTPRC	chr1	196948615	196948899
PTPRC	chr1	196952362	196952646
PTPRC	chr1	196953799	196954090
PTPRC	chr1	196958142	196958327
PTPRC	chr1	196964000	196964225
PTPRC	chr1	196964757	196964987
PTPRC	chr1	196967275	196967559
PTPRC	chr1	196967947	196968402
PTPRC	chr1	196969819	196970259
PTPRC	chr1	196970791	196970851
PTPRC	chr1	196970861	196971061
PTPRC	chr1	196977550	196977804
PTPRC	chr1	196977901	196978177
PTPRC	chr1	196979735	196980009
PTPRC	chr1	196983758	196983845
PTPRC	chr1	196983850	196983922
PTPRC	chr1	196983970	196984042
PTPRC	chr1	196985088	196985365
PTPRC	chr1	196986165	196986439
PTPRC	chr1	196987916	196988195
PTPRC	chr1	196988289	196988574
PTPRC	chr1	196989940	196990206
PTPRC	chr1	196991612	196992194
PTPRC	chr1	196992232	196993175
PTPN14	chr1	212597585	212598056
PTPN14	chr1	212604414	212604698
PTPN14	chr1	212609377	212609679
PTPN14	chr1	212612591	212612869
PTPN14	chr1	212616137	212616435
PTPN14	chr1	212617850	212618134
PTPN14	chr1	212623231	212624783
PTPN14	chr1	212626699	212626974
PTPN14	chr1	212630836	212631117
PTPN14	chr1	212633554	212633835
PTPN14	chr1	212634761	212635045
PTPN14	chr1	212637774	212637851
PTPN14	chr1	212637856	212638028
PTPN14	chr1	212641546	212641782
PTPN14	chr1	212642733	212643008
PTPN14	chr1	212651533	212651819
PTPN14	chr1	212654493	212654778
PTPN14	chr1	212691710	212691992
PTPN14	chr1	212704545	212704957
PTPN14	chr1	212791056	212791337
ALK	chr2	29269093	29270322
ALK	chr2	29273035	29273319
ALK	chr2	29273832	29274111
ALK	chr2	29283442	29283720
ALK	chr2	29286052	29286337
ALK	chr2	29290252	29290541
ALK	chr2	29296992	29297275
ALK	chr2	29298599	29299067
ALK	chr2	29299654	29299941
ALK	chr2	29301732	29302013
ALK	chr2	29303219	29303489
ALK	chr2	29303847	29304126
ALK	chr2	29305198	29305479
ALK	chr2	29308598	29308880
ALK	chr2	29309855	29310133
ALK	chr2	29315975	29316257
ALK	chr2	29327407	29327694
ALK	chr2	29351385	29351670
ALK	chr2	29351632	29351952
ALK	chr2	29373197	29373472
ALK	chr2	29394576	29394861
ALK	chr2	29397040	29397318
ALK	chr2	29404640	29404920
ALK	chr2	29460018	29460303
ALK	chr2	29608239	29608512
ALK	chr2	29771153	29771437
ALK	chr2	29793859	29794139
ALK	chr2	29996312	29997972
PPM1B	chr2	44249457	44249946
PPM1B	chr2	44281781	44282721
PPM1B	chr2	44289761	44289827
PPM1B	chr2	44289831	44290006
PPM1B	chr2	44298520	44298788
PPM1B	chr2	44299002	44299286
PPM1B	chr2	44310587	44312147
PPM1B	chr2	44312912	44314030
MSH2	chr2	47483716	47484076
MSH2	chr2	47489035	47489235
MSH2	chr2	47490716	47491047
MSH2	chr2	47492982	47493259
MSH2	chr2	47494841	47495068
MSH2	chr2	47496855	47497135
MSH2	chr2	47510339	47510602
MSH2	chr2	47526095	47526349
MSH2	chr2	47543590	47543870
MSH2	chr2	47547275	47547494
MSH2	chr2	47551506	47551791
MSH2	chr2	47555645	47555942
MSH2	chr2	47556959	47557250
MSH2	chr2	47558869	47559196
MSH2	chr2	47561277	47561558
MSH2	chr2	47563376	47563899
MSH6	chr2	47863676	47864162
MSH6	chr2	47871519	47871799
MSH6	chr2	47876481	47876753
MSH6	chr2	47879208	47881829
MSH6	chr2	47884014	47884351
MSH6	chr2	47885465	47885737
MSH6	chr2	47886160	47886439
MSH6	chr2	47886773	47887056
MSH6	chr2	47887008	47887318
MSH6	chr2	47887408	47887592
SPRED2	chr2	65393955	65394835
SPRED2	chr2	65397301	65397567
SPRED2	chr2	65412510	65412783
SPRED2	chr2	65415179	65415465
SPRED2	chr2	65425295	65425578
SPRED2	chr2	65447179	65447468
SPRED2	chr2	65512552	65513197
TET3	chr2	74126908	74129078
TET3	chr2	74154078	74154364
TET3	chr2	74161034	74161317
TET3	chr2	74168419	74168699
TET3	chr2	74170460	74170744
TET3	chr2	74173436	74173709
TET3	chr2	74174084	74174366
TET3	chr2	74179865	74180273
TET3	chr2	74180982	74182035
SUMF1	chr3	4377786	4378970
SUMF1	chr3	4392897	4393172
SUMF1	chr3	4427460	4427740
SUMF1	chr3	4433723	4434001
SUMF1	chr3	4434634	4434886
SUMF1	chr3	4436639	4436917
SUMF1	chr3	4465837	4466119
SUMF1	chr3	4469496	4469784
SUMF1	chr3	4483614	4483983
VHL	chr3	10158272	10158898
VHL	chr3	10163147	10163384
VHL	chr3	10166420	10167559
VHL	chr3	10167855	10168485
TGFBR2	chr3	30622950	30623508
TGFBR2	chr3	30639582	30639808
TGFBR2	chr3	30661181	30661456
TGFBR2	chr3	30666725	30666990
TGFBR2	chr3	30688085	30688970
TGFBR2	chr3	30690526	30690803
TGFBR2	chr3	30704798	30705073
TGFBR2	chr3	30707870	30708411
TGFBR2	chr3	30708420	30710671
MLH1	chr3	37009925	37010203
MLH1	chr3	37013008	37013295
MLH1	chr3	37017353	37017638
MLH1	chr3	37020785	37021068
MLH1	chr3	37023376	37023628
MLH1	chr3	37025205	37025485
MLH1	chr3	37028187	37028473
MLH1	chr3	37028370	37028682
MLH1	chr3	37030832	37031114
MLH1	chr3	37033898	37034187
MLH1	chr3	37036731	37037016
MLH1	chr3	37042116	37042532
MLH1	chr3	37045207	37045488
MLH1	chr3	37056588	37056876
MLH1	chr3	37058649	37058924
MLH1	chr3	37063946	37064232
MLH1	chr3	37064912	37065192
MLH1	chr3	37065310	37065583
MLH1	chr3	37066944	37067361
CTNNB1	chr3	41215900	41216192
CTNNB1	chr3	41240400	41240670
CTNNB1	chr3	41240972	41241275
CTNNB1	chr3	41241398	41241737
CTNNB1	chr3	41241782	41242102
CTNNB1	chr3	41242107	41242386
CTNNB1	chr3	41243684	41243910
CTNNB1	chr3	41249737	41250014
CTNNB1	chr3	41249938	41250392
CTNNB1	chr3	41250562	41250841
CTNNB1	chr3	41252133	41252407
CTNNB1	chr3	41252768	41253050
CTNNB1	chr3	41252963	41253279
CTNNB1	chr3	41254395	41254675
CTNNB1	chr3	41255582	41256421
CTNNB1	chr3	41256498	41256963
PTPN23	chr3	47397439	47397707
PTPN23	chr3	47412523	47412797
PTPN23	chr3	47421060	47421340
PTPN23	chr3	47421391	47421661
PTPN23	chr3	47422118	47422402
PTPN23	chr3	47422291	47422606
PTPN23	chr3	47422710	47423359
PTPN23	chr3	47423506	47423964
PTPN23	chr3	47423856	47424166
PTPN23	chr3	47424069	47424484
PTPN23	chr3	47424762	47425049
PTPN23	chr3	47425224	47425609
PTPN23	chr3	47425549	47425870
PTPN23	chr3	47425804	47426122
PTPN23	chr3	47426056	47426367
PTPN23	chr3	47426375	47428218
PTPN23	chr3	47428223	47428506
PTPN23	chr3	47428468	47428775
PTPN23	chr3	47428670	47428981
PTPN23	chr3	47428880	47429193
PTPN23	chr3	47429119	47429970
MST1R	chr3	49899393	49900032
MST1R	chr3	49902283	49902554
MST1R	chr3	49902856	49903139
MST1R	chr3	49903539	49903818
MST1R	chr3	49903742	49904064
MST1R	chr3	49904085	49904374
MST1R	chr3	49907553	49907848
MST1R	chr3	49907756	49908065
MST1R	chr3	49908084	49908370
MST1R	chr3	49908284	49908609
MST1R	chr3	49908553	49908877
MST1R	chr3	49908835	49909145
MST1R	chr3	49909063	49909379
MST1R	chr3	49909638	49909916
MST1R	chr3	49909855	49910167
MST1R	chr3	49910422	49910700
MST1R	chr3	49910893	49911173
MST1R	chr3	49911217	49911503
MST1R	chr3	49911422	49911737
MST1R	chr3	49914766	49916344
PIK3CB	chr3	139856839	139857112
PIK3CB	chr3	139857589	139857870
PIK3CB	chr3	139859144	139859423
PIK3CB	chr3	139865349	139865634
PIK3CB	chr3	139866503	139866783
PIK3CB	chr3	139883392	139883671
PIK3CB	chr3	139885115	139885400
PIK3CB	chr3	139886100	139886373
PIK3CB	chr3	139890306	139890377
PIK3CB	chr3	139890381	139890590
PIK3CB	chr3	139892458	139892733
PIK3CB	chr3	139896231	139896509
PIK3CB	chr3	139900384	139900659
PIK3CB	chr3	139905853	139906138
PIK3CB	chr3	139908606	139908879
PIK3CB	chr3	139913642	139913923
PIK3CB	chr3	139915953	139916272
PIK3CB	chr3	139934781	139935070
PIK3CB	chr3	139936101	139936386
PIK3CB	chr3	139939188	139939454
PIK3CB	chr3	139944044	139944344
PIK3CB	chr3	139957270	139957540
PIK3CB	chr3	139960640	139960924
PIK3CA	chr3	180348895	180349175
PIK3CA	chr3	180399186	180399695
PIK3CA	chr3	180400121	180400414
PIK3CA	chr3	180401725	180402051
PIK3CA	chr3	180403978	180404308
PIK3CA	chr3	180404877	180405160
PIK3CA	chr3	180409979	180410258
PIK3CA	chr3	180410593	180410874
PIK3CA	chr3	180410807	180411113
PIK3CA	chr3	180418604	180418859
PIK3CA	chr3	180419573	180419852
PIK3CA	chr3	180419988	180420262
PIK3CA	chr3	180420337	180420614
PIK3CA	chr3	180421438	180421676
PIK3CA	chr3	180424467	180424741
PIK3CA	chr3	180425112	180425377
PIK3CA	chr3	180426332	180426617
PIK3CA	chr3	180429689	180429968
PIK3CA	chr3	180430394	180430679
PIK3CA	chr3	180430609	180430910
PIK3CA	chr3	180434529	180435139
PIK3CA	chr3	180435150	180435217
FGFR3	chr4	1764768	1765046
FGFR3	chr4	1765309	1765597
FGFR3	chr4	1770728	1771088
FGFR3	chr4	1771155	1771439
FGFR3	chr4	1772829	1773102
FGFR3	chr4	1773027	1773332
FGFR3	chr4	1773281	1773586
FGFR3	chr4	1775140	1775375
FGFR3	chr4	1775799	1776079
FGFR3	chr4	1776275	1776552
FGFR3	chr4	1776790	1777273
FGFR3	chr4	1777185	1777500
FGFR3	chr4	1777451	1777952
FGFR3	chr4	1777989	1778268
FGFR3	chr4	1778234	1778539
FGFR3	chr4	1778595	1778918
FGFR3	chr4	1778935	1779422
FGFR3	chr4	1779435	1780428
PDGFRA	chr4	54789985	54790369
PDGFRA	chr4	54819565	54819845
PDGFRA	chr4	54821971	54822371
PDGFRA	chr4	54824543	54824880
PDGFRA	chr4	54825767	54826044
PDGFRA	chr4	54828148	54828437
PDGFRA	chr4	54828382	54828701
PDGFRA	chr4	54831469	54831749
PDGFRA	chr4	54833230	54833509
PDGFRA	chr4	54834408	54834691
PDGFRA	chr4	54835355	54835630
PDGFRA	chr4	54835685	54835961
PDGFRA	chr4	54838216	54838492
PDGFRA	chr4	54838729	54839004
PDGFRA	chr4	54839212	54839496
PDGFRA	chr4	54841177	54841456
PDGFRA	chr4	54846203	54846487
PDGFRA	chr4	54846675	54846963
PDGFRA	chr4	54848259	54848536
PDGFRA	chr4	54849627	54849901
PDGFRA	chr4	54849802	54850108
PDGFRA	chr4	54851186	54851513
PDGFRA	chr4	54855999	54857031
KIT	chr4	55218779	55219063
KIT	chr4	55256384	55256478
KIT	chr4	55256479	55256740
KIT	chr4	55259156	55259520
KIT	chr4	55260472	55260759
KIT	chr4	55264615	55264862
KIT	chr4	55267967	55268247
KIT	chr4	55270259	55270504
KIT	chr4	55284416	55284695
KIT	chr4	55286731	55287000
KIT	chr4	55288048	55288326
KIT	chr4	55288213	55288530
KIT	chr4	55288650	55289111
KIT	chr4	55290182	55290466
KIT	chr4	55292148	55292424
KIT	chr4	55292708	55292965
KIT	chr4	55293903	55294186
KIT	chr4	55297326	55297601
KIT	chr4	55297518	55297795
KIT	chr4	55298005	55298276
KIT	chr4	55299301	55300955
KIT	chr4	55300961	55301674
KDR	chr4	55639133	55639209
KDR	chr4	55639333	55641127
KDR	chr4	55642774	55643063
KDR	chr4	55643359	55643633
KDR	chr4	55648461	55648744
KDR	chr4	55649699	55649980
KDR	chr4	55650197	55650475
KDR	chr4	55650520	55650806
KDR	chr4	55650763	55651082
KDR	chr4	55653439	55653727
KDR	chr4	55655654	55655929
KDR	chr4	55656396	55656677
KDR	chr4	55657061	55657337
KDR	chr4	55658487	55658769
KDR	chr4	55658978	55659252
KDR	chr4	55659525	55659806
KDR	chr4	55662791	55663020
KDR	chr4	55663213	55663496
KDR	chr4	55665516	55665944
KDR	chr4	55666663	55666935
KDR	chr4	55667522	55667801
KDR	chr4	55668588	55668874
KDR	chr4	55671259	55671543
KDR	chr4	55671453	55671711
KDR	chr4	55674170	55674453
KDR	chr4	55674974	55675253
KDR	chr4	55675736	55676010
KDR	chr4	55676124	55676395
KDR	chr4	55679480	55679755
KDR	chr4	55681920	55682194
KDR	chr4	55686104	55686552
PTPN13	chr4	87734446	87734992
PTPN13	chr4	87775338	87775566
PTPN13	chr4	87812510	87812742
PTPN13	chr4	87826772	87827054
PTPN13	chr4	87829129	87829402
PTPN13	chr4	87833662	87833934
PTPN13	chr4	87841372	87842010
PTPN13	chr4	87856606	87856882
PTPN13	chr4	87857098	87857373
PTPN13	chr4	87862339	87862643
PTPN13	chr4	87872463	87872740
PTPN13	chr4	87872673	87872991
PTPN13	chr4	87874441	87874691
PTPN13	chr4	87874832	87875108
PTPN13	chr4	87875696	87875980
PTPN13	chr4	87881751	87882029
PTPN13	chr4	87885073	87885359
PTPN13	chr4	87890596	87891099
PTPN13	chr4	87891105	87891387
PTPN13	chr4	87893068	87893345
PTPN13	chr4	87898331	87898622
PTPN13	chr4	87898758	87899038
PTPN13	chr4	87898999	87899307
PTPN13	chr4	87902856	87903394
PTPN13	chr4	87904750	87904968
PTPN13	chr4	87905470	87905746
PTPN13	chr4	87906501	87906780
PTPN13	chr4	87907927	87908209
PTPN13	chr4	87909896	87910194
PTPN13	chr4	87910139	87910464
PTPN13	chr4	87911300	87911742
PTPN13	chr4	87912896	87913161
PTPN13	chr4	87914483	87914753
PTPN13	chr4	87915285	87915564
PTPN13	chr4	87915572	87915864
PTPN13	chr4	87920523	87920699
PTPN13	chr4	87922263	87922541
PTPN13	chr4	87924540	87924796
PTPN13	chr4	87925326	87925611
PTPN13	chr4	87925918	87926199
PTPN13	chr4	87936931	87937215
PTPN13	chr4	87939179	87939463
PTPN13	chr4	87943811	87944093
PTPN13	chr4	87945352	87945637
PTPN13	chr4	87947687	87948104
PTPN13	chr4	87949899	87950201
PTPN13	chr4	87951107	87951366
PTPN13	chr4	87954587	87955384
ATOH1	chr4	94969055	94970191
TET2	chr4	106287343	106287625
TET2	chr4	106330893	106331176
TET2	chr4	106374457	106377983
TET2	chr4	106381839	106382125
TET2	chr4	106383337	106383616
TET2	chr4	106384125	106384418
TET2	chr4	106400152	106400430
TET2	chr4	106402260	106402541
TET2	chr4	106410136	106410401
TET2	chr4	106413120	106413559
TET2	chr4	106415606	106417031
SPRY1	chr4	124537323	124537597
SPRY1	chr4	124540084	124540432
SPRY1	chr4	124542101	124543218
SPRY1	chr4	124543226	124544396
FBXW7	chr4	153461809	153462037
FBXW7	chr4	153462039	153462656
FBXW7	chr4	153462674	153462934
FBXW7	chr4	153462939	153463399
FBXW7	chr4	153463409	153463780
FBXW7	chr4	153464740	153465035
FBXW7	chr4	153466557	153466859
FBXW7	chr4	153468750	153469035
FBXW7	chr4	153470185	153470463
FBXW7	chr4	153471252	153471533
FBXW7	chr4	153473119	153473367
FBXW7	chr4	153478322	153478604
FBXW7	chr4	153487457	153487684
FBXW7	chr4	153490534	153490814
FBXW7	chr4	153493021	153493598
FBXW7	chr4	153522745	153523149
FBXW7	chr4	153551858	153552506
FBXW7	chr4	153675436	153675711
PIK3R1	chr5	67558169	67558625
PIK3R1	chr5	67604869	67605156
PIK3R1	chr5	67605409	67605686
PIK3R1	chr5	67611101	67611380
PIK3R1	chr5	67612096	67612345
PIK3R1	chr5	67612405	67612686
PIK3R1	chr5	67619957	67620369
PIK3R1	chr5	67622189	67622468
PIK3R1	chr5	67623753	67624020
PIK3R1	chr5	67624618	67624862
PIK3R1	chr5	67624794	67625111
PIK3R1	chr5	67625207	67625482
PIK3R1	chr5	67626045	67626317
PIK3R1	chr5	67626674	67626959
PIK3R1	chr5	67626853	67627171
PIK3R1	chr5	67627693	67627974
PIK3R1	chr5	67628947	67629419
PIK3R1	chr5	67629455	67630028
APC	chr5	112071068	112071507
APC	chr5	112101341	112101615
APC	chr5	112101854	112102139
APC	chr5	112118399	112118677
APC	chr5	112129813	112130099
APC	chr5	112130734	112131016
APC	chr5	112139130	112139210
APC	chr5	112139213	112139404
APC	chr5	112144294	112144577
APC	chr5	112155933	112156216
APC	chr5	112164801	112165005
APC	chr5	112178993	112179255
APC	chr5	112182516	112182975
APC	chr5	112185393	112185674
APC	chr5	112190626	112190906
APC	chr5	112191418	112191632
APC	chr5	112192361	112192646
APC	chr5	112198500	112198792
APC	chr5	112201102	112209870
SPRY4	chr5	141673952	141674929
SPRY4	chr5	141684545	141684838
CSF1R	chr5	149412998	149414014
CSF1R	chr5	149413941	149414266
CSF1R	chr5	149414893	149415172
CSF1R	chr5	149415691	149416171
CSF1R	chr5	149416944	149417227
CSF1R	chr5	149417121	149417432
CSF1R	chr5	149419390	149419675
CSF1R	chr5	149420522	149420798
CSF1R	chr5	149421148	149421429
CSF1R	chr5	149421361	149421675
CSF1R	chr5	149427882	149427999
CSF1R	chr5	149428003	149428165
CSF1R	chr5	149429578	149429860
CSF1R	chr5	149429816	149430128
CSF1R	chr5	149430088	149430400
CSF1R	chr5	149433003	149433291
CSF1R	chr5	149436962	149437248
CSF1R	chr5	149437790	149438073
CSF1R	chr5	149439761	149440118
CSF1R	chr5	149440477	149440810
CSF1R	chr5	149446084	149446394
CSF1R	chr5	149472927	149473201
PDGFRB	chr5	149474951	149475737
PDGFRB	chr5	149477328	149477636
PDGFRB	chr5	149478408	149478686
PDGFRB	chr5	149479127	149479401
PDGFRB	chr5	149479674	149479959
PDGFRB	chr5	149480559	149480833
PDGFRB	chr5	149480873	149481145
PDGFRB	chr5	149481570	149481848
PDGFRB	chr5	149482727	149483009
PDGFRB	chr5	149483910	149484193
PDGFRB	chr5	149484387	149484660
PDGFRB	chr5	149485121	149485401
PDGFRB	chr5	149486175	149486463
PDGFRB	chr5	149489463	149489759
PDGFRB	chr5	149490208	149490492
PDGFRB	chr5	149491644	149491919
PDGFRB	chr5	149492456	149492733
PDGFRB	chr5	149493279	149493561
PDGFRB	chr5	149493513	149493828
PDGFRB	chr5	149494458	149494808
PDGFRB	chr5	149495263	149495669
PDGFRB	chr5	149496636	149496922
PDGFRB	chr5	149515105	149515652
NPM1	chr5	170747352	170747566
NPM1	chr5	170749554	170749697
NPM1	chr5	170749704	170749825
NPM1	chr5	170750828	170750953
NPM1	chr5	170751002	170751106
NPM1	chr5	170751213	170751347
NPM1	chr5	170751372	170751496
NPM1	chr5	170752223	170752350
NPM1	chr5	170752391	170752685
NPM1	chr5	170759645	170759773
NPM1	chr5	170759785	170759920
NPM1	chr5	170760342	170760487
NPM1	chr5	170760500	170760619
NPM1	chr5	170764811	170764947
NPM1	chr5	170764981	170765089
NPM1	chr5	170765960	170766067
NPM1	chr5	170766105	170766319
NPM1	chr5	170767198	170767473
NPM1	chr5	170770175	170770240
PIM1	chr6	37245853	37246013
PIM1	chr6	37246019	37246440
PIM1	chr6	37246399	37246882
PIM1	chr6	37246799	37247260
PIM1	chr6	37248692	37248970
PIM1	chr6	37249637	37250752
PIM1	chr6	37250755	37251209
PIM1	chr6	41622093	41622616
FOXP4	chr6	41641411	41641720
FOXP4	chr6	41653600	41653876
FOXP4	chr6	41660397	41660684
FOXP4	chr6	41661040	41661316
FOXP4	chr6	41662653	41662933
FOXP4	chr6	41662965	41663260
FOXP4	chr6	41663412	41663692
FOXP4	chr6	41664258	41664535
FOXP4	chr6	41665388	41665661
FOXP4	chr6	41665598	41665920
FOXP4	chr6	41665843	41666154
FOXP4	chr6	41666842	41667108
FOXP4	chr6	41670501	41670777
FOXP4	chr6	41672779	41673056
FOXP4	chr6	41673434	41673716
FOXP4	chr6	41674455	41675027
PMS2	chr7	5979350	5979737
PMS2	chr7	5983683	5983962
PMS2	chr7	5984716	5984939
PMS2	chr7	5988917	5989197
PMS2	chr7	5992888	5993796
PMS2	chr7	5995887	5996162
PMS2	chr7	5998026	5998301
PMS2	chr7	6001592	6001874
PMS2	chr7	6003386	6003655
PMS2	chr7	6005198	6005476
PMS2	chr7	6008681	6008782
PMS2	chr7	6010036	6010131
PMS2	chr7	6010146	6010307
PMS2	chr7	6015062	6015335
PHF14	chr7	10979994	10980506
PHF14	chr7	10980895	10981168
PHF14	chr7	10988498	10988722
PHF14	chr7	10988813	10989341
PHF14	chr7	10996806	10997064
PHF14	chr7	11019828	11020104
PHF14	chr7	11028927	11029201
PHF14	chr7	11034751	11035037
PHF14	chr7	11041717	11041994
PHF14	chr7	11042524	11042870
PHF14	chr7	11043042	11043322
PHF14	chr7	11044829	11045092
PHF14	chr7	11046775	11047007
PHF14	chr7	11048752	11049034
PHF14	chr7	11057702	11057945
PHF14	chr7	11067817	11067914
PHF14	chr7	11067927	11068098
PHF14	chr7	11067996	11068305
PHF14	chr7	11108590	11109837
PHF14	chr7	11117415	11117696
PHF14	chr7	11175521	11175793
EGFR	chr7	55054172	55054586
EGFR	chr7	55177399	55177680
EGFR	chr7	55178433	55178704
EGFR	chr7	55181710	55181991
EGFR	chr7	55186364	55186648
EGFR	chr7	55187643	55187929
EGFR	chr7	55189118	55189404
EGFR	chr7	55190927	55191210
EGFR	chr7	55191635	55192114
EGFR	chr7	55192745	55193026
EGFR	chr7	55195280	55195558
EGFR	chr7	55196606	55196882
EGFR	chr7	55198814	55199097
EGFR	chr7	55200403	55200681
EGFR	chr7	55206230	55206514
EGFR	chr7	55208091	55208373
EGFR	chr7	55209019	55209291
EGFR	chr7	55209809	55210092
EGFR	chr7	55216427	55216708
EGFR	chr7	55226838	55227119
EGFR	chr7	55227840	55228127
EGFR	chr7	55233826	55234115
EGFR	chr7	55235405	55235687
EGFR	chr7	55236310	55236558
EGFR	chr7	55236795	55237075
EGFR	chr7	55237608	55237890
EGFR	chr7	55240397	55242564
PIK3CG	chr7	106293109	106293488
PIK3CG	chr7	106295185	106297265
PIK3CG	chr7	106300105	106300378
PIK3CG	chr7	106300310	106300648
PIK3CG	chr7	106302285	106302563
PIK3CG	chr7	106307127	106307405
PIK3CG	chr7	106309692	106309971
PIK3CG	chr7	106310632	106310915
PIK3CG	chr7	106311741	106311987
PIK3CG	chr7	106313748	106314025
PIK3CG	chr7	106332739	106334031
MET	chr7	116099633	116099910
MET	chr7	116126310	116127606
MET	chr7	116158906	116159184
MET	chr7	116167160	116167437
MET	chr7	116168079	116168363
MET	chr7	116182576	116182856
MET	chr7	116184630	116184912
MET	chr7	116184818	116185119
MET	chr7	116185679	116185960
MET	chr7	116186553	116186833
MET	chr7	116190289	116190595
MET	chr7	116196922	116197145
MET	chr7	116198718	116198996
MET	chr7	116199118	116199346
MET	chr7	116202125	116202438
MET	chr7	116204578	116204850
MET	chr7	116206009	116206292
MET	chr7	116209183	116209462
MET	chr7	116210528	116210808
MET	chr7	116222862	116223143
MET	chr7	116223092	116223935
BRAF	chr7	140080232	140081049
BRAF	chr7	140086002	140086239
BRAF	chr7	140095476	140095751
BRAF	chr7	140099454	140099738
BRAF	chr7	140100332	140100610
BRAF	chr7	140123123	140123398
BRAF	chr7	140124154	140124392
BRAF	chr7	140127758	140128027
BRAF	chr7	140129211	140129487
BRAF	chr7	140133688	140133964
BRAF	chr7	140140511	140140792
BRAF	chr7	140146541	140146771
BRAF	chr7	140147605	140147883
BRAF	chr7	140154129	140154414
BRAF	chr7	140155062	140155341
BRAF	chr7	140180832	140181175
BRAF	chr7	140196280	140196565
BRAF	chr7	140270785	140271061
FGFR1	chr8	38387767	38388769
FGFR1	chr8	38388997	38389469
FGFR1	chr8	38389532	38390507
FGFR1	chr8	38390464	38390771
FGFR1	chr8	38390709	38391027
FGFR1	chr8	38391121	38391397
FGFR1	chr8	38391343	38391646
FGFR1	chr8	38392494	38392773
FGFR1	chr8	38393886	38394162
FGFR1	chr8	38394459	38394737
FGFR1	chr8	38394826	38395109
FGFR1	chr8	38396161	38396444
FGFR1	chr8	38398398	38398683
FGFR1	chr8	38401129	38401405
FGFR1	chr8	38402709	38402992
FGFR1	chr8	38404535	38404805
FGFR1	chr8	38404920	38405189
FGFR1	chr8	38406311	38406656
FGFR1	chr8	38433974	38434243
FGFR1	chr8	38444608	38445546
JAK2	chr9	4975195	4975661
JAK2	chr9	4975840	4976118
JAK2	chr9	5011922	5012240
JAK2	chr9	5019699	5019971
JAK2	chr9	5034311	5034597
JAK2	chr9	5040609	5040891
JAK2	chr9	5044527	5044916
JAK2	chr9	5045583	5045848
JAK2	chr9	5054861	5055095
JAK2	chr9	5056588	5056866
JAK2	chr9	5058964	5059237
JAK2	chr9	5059839	5060122
JAK2	chr9	5062410	5062699
JAK2	chr9	5063595	5063873
JAK2	chr9	5067366	5067638
JAK2	chr9	5068229	5068503
JAK2	chr9	5070159	5070436
JAK2	chr9	5070458	5070739
JAK2	chr9	5071642	5071924
JAK2	chr9	5079619	5079901
JAK2	chr9	5080360	5080640
JAK2	chr9	5080679	5080960
JAK2	chr9	5112917	5113160
JAK2	chr9	5116239	5116520
JAK2	chr9	5116635	5118088
JAK2	chr9	5118113	5118211
PTPRD	chr9	8307035	8307962
PTPRD	chr9	8309749	8310023
PTPRD	chr9	8321513	8321790
PTPRD	chr9	8328854	8329113
PTPRD	chr9	8330255	8330535
PTPRD	chr9	8331029	8331290
PTPRD	chr9	8331642	8332014
PTPRD	chr9	8365862	8366152
PTPRD	chr9	8366541	8366793
PTPRD	chr9	8379169	8379457
PTPRD	chr9	8394450	8394733
PTPRD	chr9	8426493	8426775
PTPRD	chr9	8439633	8439875
PTPRD	chr9	8450344	8450626
PTPRD	chr9	8455416	8455706
PTPRD	chr9	8460894	8461167
PTPRD	chr9	8474073	8474406
PTPRD	chr9	8475129	8475402
PTPRD	chr9	8475711	8476381
PTPRD	chr9	8482774	8483048
PTPRD	chr9	8487109	8487372
PTPRD	chr9	8489596	8489874
PTPRD	chr9	8490708	8491091
PTPRD	chr9	8494183	8494469
PTPRD	chr9	8497222	8497490
PTPRD	chr9	8507802	8508450
PTPRD	chr9	8511227	8511576
PTPRD	chr9	8513372	8513649
PTPRD	chr9	8514829	8515119
PTPRD	chr9	8516510	8516762
PTPRD	chr9	8517199	8517478
PTPRD	chr9	8518544	8518821
PTPRD	chr9	8623238	8623516
PTPRD	chr9	8626625	8626879
PTPRD	chr9	8723717	8723979
PTPRD	chr9	9008567	9008846
PTPRD	chr9	9173197	9173465
PTPRD	chr9	9387315	9387595
PTPRD	chr9	9564608	9564887
PTPRD	chr9	9724402	9724681
PTPRD	chr9	9756680	9756961
PTPRD	chr9	9928411	9928684
PTPRD	chr9	10023603	10023888
PTPRD	chr9	10330840	10331120
PTPRD	chr9	10602303	10602587
CDKN2A	chr9	21957775	21958274
CDKN2A	chr9	21960855	21961245
CDKN2A	chr9	21964353	21965070
CDKN2B	chr9	21984087	21984523
CDKN2B	chr9	21992851	21993295
CDKN2B	chr9	21993296	21995119
CDKN2B	chr9	21995131	21996282
CDKN2A	chr9	21998627	21999347
PTCH1	chr9	97247955	97248517
PTCH1	chr9	97248963	97249588
PTCH1	chr9	97251123	97251461
PTCH1	chr9	97251848	97252130
PTCH1	chr9	97255521	97255789
PTCH1	chr9	97258297	97258584
PTCH1	chr9	97260067	97260431
PTCH1	chr9	97261648	97261928
PTCH1	chr9	97263880	97264165
PTCH1	chr9	97269168	97269564
PTCH1	chr9	97270808	97271294
PTCH1	chr9	97271828	97272104
PTCH1	chr9	97278049	97278331
PTCH1	chr9	97278760	97279052
PTCH1	chr9	97279581	97279867
PTCH1	chr9	97280073	97280357
PTCH1	chr9	97281029	97281310
PTCH1	chr9	97281983	97282256
PTCH1	chr9	97282442	97282725
PTCH1	chr9	97283949	97284399
PTCH1	chr9	97287732	97288013
PTCH1	chr9	97308456	97308738
PTCH1	chr9	97310213	97310476
PTCH1	chr9	97310478	97310683
PTCH1	chr9	97318678	97318792
PTCH1	chr9	97318795	97319100
NOTCH1	chr9	138510950	138511858
NOTCH1	chr9	138513072	138513350
NOTCH1	chr9	138513275	138513597
NOTCH1	chr9	138514777	138515156
NOTCH1	chr9	138515957	138516237
NOTCH1	chr9	138516133	138516450
NOTCH1	chr9	138516498	138516787
NOTCH1	chr9	138517383	138517659
NOTCH1	chr9	138518899	138519410
NOTCH1	chr9	138519537	138520179
NOTCH1	chr9	138520707	138520984
NOTCH1	chr9	138520910	138521264
NOTCH1	chr9	138521495	138521774
NOTCH1	chr9	138522170	138522455
NOTCH1	chr9	138522402	138522717
NOTCH1	chr9	138523097	138523379
NOTCH1	chr9	138523960	138524269
NOTCH1	chr9	138524856	138525136
NOTCH1	chr9	138525334	138525620
NOTCH1	chr9	138527201	138527487
NOTCH1	chr9	138527592	138527869
NOTCH1	chr9	138528729	138529016
NOTCH1	chr9	138529467	138529749
NOTCH1	chr9	138529680	138530022
NOTCH1	chr9	138530164	138530386
NOTCH1	chr9	138531453	138531738
NOTCH1	chr9	138531971	138532256
NOTCH1	chr9	138532338	138532626
NOTCH1	chr9	138532817	138533137
NOTCH1	chr9	138533626	138533913
NOTCH1	chr9	138537077	138537498
NOTCH1	chr9	138537944	138538288
NOTCH1	chr9	138558188	138558465
NOTCH1	chr9	138559883	138560157
GATA1	chrX	48529889	48530092
GATA1	chrX	48534395	48534711
GATA1	chrX	48535146	48535606
GATA1	chrX	48535564	48535880
GATA1	chrX	48536437	48536709
GATA1	chrX	48537098	48537696
PHF6	chrX	133334937	133335216
PHF6	chrX	133339224	133339491
PHF6	chrX	133339604	133339886
PHF6	chrX	133355116	133355359
PHF6	chrX	133355476	133355754
PHF6	chrX	133375121	133375399
PHF6	chrX	133375441	133375701
PHF6	chrX	133376613	133376888
PHF6	chrX	133378786	133379064
PHF6	chrX	133386814	133387093
PHF6	chrX	133387306	133388034
SPRY3	chrX	154650619	154650768
SPRY3	chrX	154650784	154651021
SPRY3	chrX	154656575	154658030
SPRY3	chrY	57509819	57509968
SPRY3	chrY	57509984	57510221
SPRY3	chrY	57515775	57517032
RET	chr10	42892477	42892758
RET	chr10	42915864	42916203
RET	chr10	42917750	42918110
RET	chr10	42920356	42920683
RET	chr10	42921781	42922060
RET	chr10	42924438	42924711
RET	chr10	42926610	42926946
RET	chr10	42927466	42927740
RET	chr10	42928214	42928495
RET	chr10	42928924	42929206
RET	chr10	42929887	42930220
RET	chr10	42931966	42932242
RET	chr10	42933730	42933972
RET	chr10	42934939	42935233
RET	chr10	42935450	42935732
RET	chr10	42937284	42937557
RET	chr10	42939048	42939330
RET	chr10	42940241	42940523
RET	chr10	42941978	42942973
RET	chr10	42943513	42945815
TET1	chr10	69990074	69990533
TET1	chr10	70001932	70004043
TET1	chr10	70030623	70030900
TET1	chr10	70074415	70076800
TET1	chr10	70081506	70081779
TET1	chr10	70082165	70082440
TET1	chr10	70096758	70097048
TET1	chr10	70102584	70102866
TET1	chr10	70111059	70111279
TET1	chr10	70112520	70112801
TET1	chr10	70116072	70116505
TET1	chr10	70120522	70121027
PTEN	chr10	89613159	89613673
PTEN	chr10	89613709	89614314
PTEN	chr10	89643657	89643938
PTEN	chr10	89675121	89675231
PTEN	chr10	89675236	89675404
PTEN	chr10	89680654	89680942
PTEN	chr10	89682704	89683017
PTEN	chr10	89701775	89702059
PTEN	chr10	89707525	89707804
PTEN	chr10	89710620	89710881
PTEN	chr10	89714978	89716027
FGFR2	chr10	123227788	123228933
FGFR2	chr10	123228938	123229559
FGFR2	chr10	123233104	123233387
FGFR2	chr10	123234819	123235097
FGFR2	chr10	123236742	123237029
FGFR2	chr10	123237409	123237685
FGFR2	chr10	123245981	123246266
FGFR2	chr10	123247908	123248186
FGFR2	chr10	123250243	123250528
FGFR2	chr10	123253223	123253503
FGFR2	chr10	123264573	123264857
FGFR2	chr10	123266748	123267023
FGFR2	chr10	123269428	123269709
FGFR2	chr10	123288010	123288294
FGFR2	chr10	123300743	123301013
FGFR2	chr10	123313894	123314181
FGFR2	chr10	123314891	123315239
FGFR2	chr10	123343167	123343506
FGFR2	chr10	123347418	123347977
HRAS	chr11	524143	524420
HRAS	chr11	522241	522785
HRAS	chr11	523171	523442
HRAS	chr11	523347	523672
HRAS	chr11	523708	523986
HRAS	chr11	525337	525613
WT1	chr11	32365855	32366115
WT1	chr11	32366150	32367340
WT1	chr11	32369994	32370274
WT1	chr11	32370682	32370964
WT1	chr11	32374306	32374586
WT1	chr11	32377967	32378247
WT1	chr11	32394489	32394771
WT1	chr11	32395591	32395864
WT1	chr11	32405980	32406261
WT1	chr11	32406531	32406816
WT1	chr11	32412776	32413681
CBL	chr11	118582153	118582219
CBL	chr11	118582229	118582569
CBL	chr11	118608321	118608642
CBL	chr11	118647607	118647860
CBL	chr11	118649719	118649993
CBL	chr11	118650677	118650947
CBL	chr11	118651837	118652114
CBL	chr11	118653575	118653854
CBL	chr11	118654001	118654284
CBL	chr11	118654379	118654673
CBL	chr11	118660804	118661085
CBL	chr11	118661024	118661513
CBL	chr11	118663670	118663948
CBL	chr11	118672745	118673023
CBL	chr11	118673207	118673486
CBL	chr11	118674220	118674496
CBL	chr11	118675388	118676027
PTPN11	chr12	111411137	111411426
PTPN6	chr12	6930649	6930975
PTPN6	chr12	6930914	6931228
PTPN6	chr12	6931357	6931636
PTPN6	chr12	6934176	6934453
PTPN6	chr12	6934487	6934764
PTPN6	chr12	6934673	6934985
PTPN6	chr12	6934986	6935265
PTPN6	chr12	6935459	6935740
PTPN6	chr12	6935772	6936048
PTPN6	chr12	6936997	6937275
PTPN6	chr12	6937235	6937558
PTPN6	chr12	6939236	6939511
PTPN6	chr12	6939404	6939723
PTPN6	chr12	6939628	6939949
PTPN6	chr12	6940150	6940434
PTPN6	chr12	6940499	6940779
ETV6	chr12	11694008	11694398
ETV6	chr12	11796569	11796849
ETV6	chr12	11883307	11883549
ETV6	chr12	11897546	11897826
ETV6	chr12	11913574	11914206
ETV6	chr12	11928566	11928851
ETV6	chr12	11930029	11930298
ETV6	chr12	11935096	11935570
ETV6	chr12	11935571	11935664
ETV6	chr12	11935666	11935809
ETV6	chr12	11935851	11936036
PTPRO	chr12	15366703	15367030
PTPRO	chr12	15528127	15528485
PTPRO	chr12	15541374	15541662
PTPRO	chr12	15543569	15543851
PTPRO	chr12	15545770	15546297
PTPRO	chr12	15548041	15548323
PTPRO	chr12	15552719	15553003
PTPRO	chr12	15559608	15559883
PTPRO	chr12	15560915	15561192
PTPRO	chr12	15564312	15564593
PTPRO	chr12	15568941	15569221
PTPRO	chr12	15570257	15570539
PTPRO	chr12	15590739	15590972
PTPRO	chr12	15593240	15593478
PTPRO	chr12	15595666	15595940
PTPRO	chr12	15601544	15601823
PTPRO	chr12	15604286	15604565
PTPRO	chr12	15609661	15609940
PTPRO	chr12	15613513	15613788
PTPRO	chr12	15622953	15623237
PTPRO	chr12	15624129	15624416
PTPRO	chr12	15624819	15625094
PTPRO	chr12	15625791	15626075
PTPRO	chr12	15631024	15631309
PTPRO	chr12	15633588	15633851
PTPRO	chr12	15639048	15639334
PTPRO	chr12	15640242	15641638
KRAS	chr12	25252954	25253378
KRAS	chr12	25253380	25254143
KRAS	chr12	25259549	25259824
KRAS	chr12	25269749	25270028
KRAS	chr12	25271378	25271659
KRAS	chr12	25289385	25289664
KRAS	chr12	25294891	25295173
CDK4	chr12	56428299	56428697
CDK4	chr12	56429153	56429434
CDK4	chr12	56429349	56429663
CDK4	chr12	56430615	56430878
CDK4	chr12	56430906	56431194
CDK4	chr12	56431146	56431460
CDK4	chr12	56431504	56431824
CDK4	chr12	56432176	56432462
MDM2	chr12	67488190	67488573
MDM2	chr12	67489148	67489430
MDM2	chr12	67493492	67493775
MDM2	chr12	67496775	67497061
MDM2	chr12	67500247	67500525
MDM2	chr12	67504293	67504574
MDM2	chr12	67504477	67504787
MDM2	chr12	67508750	67509028
MDM2	chr12	67515853	67516086
MDM2	chr12	67516612	67516892
MDM2	chr12	67519275	67520027
PTPN11	chr12	111340869	111341338
PTPN11	chr12	111368378	111368657
PTPN11	chr12	111372451	111372741
PTPN11	chr12	111375362	111375613
PTPN11	chr12	111376668	111376940
PTPN11	chr12	111378068	111378324
PTPN11	chr12	111395073	111395313
PTPN11	chr12	111399727	111400006
PTPN11	chr12	111399948	111400243
PTPN11	chr12	111404176	111404462
PTPN11	chr12	111408588	111408870
PTPN11	chr12	111410513	111410792
PTPN11	chr12	111424241	111424508
PTPN11	chr12	111426782	111427064
PTPN11	chr12	111427963	111428341
PTPN11	chr12	111428366	111429026
PTPN11	chr13	27475390	27476343
FLT3	chr13	27486491	27486778
FLT3	chr13	27487194	27487468
FLT3	chr13	27487633	27487903
FLT3	chr13	27490514	27490804
FLT3	chr13	27495455	27495685
FLT3	chr13	27496890	27497139
FLT3	chr13	27499152	27499436
FLT3	chr13	27500239	27500492
FLT3	chr13	27505926	27506212
FLT3	chr13	27506109	27506422
FLT3	chr13	27506317	27506625
FLT3	chr13	27507575	27507846
FLT3	chr13	27507979	27508259
FLT3	chr13	27509223	27509512
FLT3	chr13	27520350	27520627
FLT3	chr13	27521452	27521728
FLT3	chr13	27521660	27521965
FLT3	chr13	27522148	27522429
FLT3	chr13	27524596	27524855
FLT3	chr13	27529391	27529669
FLT3	chr13	27533957	27534242
FLT3	chr13	27542540	27542768
FLT3	chr13	27572520	27572796
RB1	chr13	47775833	47776224
RB1	chr13	47779329	47779584
RB1	chr13	47814648	47814926
RB1	chr13	47817127	47817405
RB1	chr13	47819855	47820114
RB1	chr13	47820986	47821251
RB1	chr13	47832060	47832342
RB1	chr13	47834872	47835156
RB1	chr13	47836919	47837189
RB1	chr13	47839539	47839814
RB1	chr13	47840557	47840821
RB1	chr13	47845485	47845715
RB1	chr13	47848964	47849245
RB1	chr13	47851718	47851830
RB1	chr13	47852170	47852253
RB1	chr13	47852290	47852463
RB1	chr13	47853371	47853619
RB1	chr13	47925038	47925319
RB1	chr13	47928263	47928544
RB1	chr13	47931752	47932028
RB1	chr13	47935774	47936056
RB1	chr13	47937111	47937322
RB1	chr13	47937240	47937534
RB1	chr13	47945362	47945637
RB1	chr13	47948758	47949041
RB1	chr13	47949369	47949648
RB1	chr13	47952084	47954058
RB1	chr13	79808063	79809922
RB1	chr13	79812708	79813119
IRS2	chr13	109204134	109205177
IRS2	chr13	109205204	109205501
IRS2	chr13	109205579	109206693
IRS2	chr13	109232344	109236325
IRS2	chr13	109236329	109236860
IRS2	chr13	109236869	109236949
SPRED1	chr15	36332293	36332742
SPRED1	chr15	36378807	36379087
SPRED1	chr15	36401671	36401950
SPRED1	chr15	36404130	36404416
SPRED1	chr15	36419159	36419441
SPRED1	chr15	36428817	36429099
SPRED1	chr15	36430460	36431528
PTPN9	chr15	73546469	73547602
PTPN9	chr15	73547644	73548409
PTPN9	chr15	73549139	73549424
PTPN9	chr15	73549998	73550278
PTPN9	chr15	73552971	73553249
PTPN9	chr15	73559126	73559407
PTPN9	chr15	73569501	73569779
PTPN9	chr15	73585020	73585428
PTPN9	chr15	73588222	73588502
PTPN9	chr15	73596597	73596836
PTPN9	chr15	73602428	73602674
PTPN9	chr15	73603524	73603782
PTPN9	chr15	73606440	73606677
PTPN9	chr15	73658059	73658716
IGF1R	chr15	97010205	97010269
IGF1R	chr15	97010295	97010479
IGF1R	chr15	97068268	97068894
IGF1R	chr15	97252030	97252423
IGF1R	chr15	97257492	97257705
IGF1R	chr15	97260154	97260438
IGF1R	chr15	97269390	97269679
IGF1R	chr15	97271983	97272255
IGF1R	chr15	97273748	97274066
IGF1R	chr15	97276650	97276932
IGF1R	chr15	97277374	97277662
IGF1R	chr15	97282853	97283220
IGF1R	chr15	97284549	97284837
IGF1R	chr15	97285207	97285485
IGF1R	chr15	97290215	97290498
IGF1R	chr15	97290871	97291157
IGF1R	chr15	97295526	97295842
IGF1R	chr15	97295975	97296254
IGF1R	chr15	97299907	97300161
IGF1R	chr15	97303594	97303868
IGF1R	chr15	97309243	97309527
IGF1R	chr15	97317766	97318527
SOCS1	chr16	11255821	11256914
SOCS1	chr16	11257343	11257619
ERBB2	chr17	35127029	35127312
TNK1	chr17	7224975	7225258
TNK1	chr17	7226833	7227159
TNK1	chr17	7227178	7227463
TNK1	chr17	7227382	7227702
TNK1	chr17	7227648	7227959
TNK1	chr17	7227966	7228322
TNK1	chr17	7228479	7228827
TNK1	chr17	7230503	7230784
TNK1	chr17	7230964	7231248
TNK1	chr17	7231313	7231540
TNK1	chr17	7232402	7232784
TNK1	chr17	7232693	7233016
TNK1	chr17	7232928	7233846
TP53	chr17	7512399	7512602
TP53	chr17	7512899	7513770
TP53	chr17	7514558	7514838
TP53	chr17	7517225	7517449
TP53	chr17	7517469	7517941
TP53	chr17	7518128	7518410
TP53	chr17	7518811	7519095
TP53	chr17	7519001	7519323
TP53	chr17	7519991	7520343
TP53	chr17	7520251	7520746
TP53	chr17	7531356	7531640
MAP2K4	chr17	11864806	11865076
MAP2K4	chr17	11898836	11899116
MAP2K4	chr17	11925339	11925620
MAP2K4	chr17	11939526	11939812
MAP2K4	chr17	11951742	11952025
MAP2K4	chr17	11954297	11954571
MAP2K4	chr17	11957193	11957475
MAP2K4	chr17	11969225	11969505
MAP2K4	chr17	11973106	11973392
MAP2K4	chr17	11983753	11984028
MAP2K4	chr17	11985138	11986731
MAP2K4	chr17	11986738	11987815
NF1	chr17	26446071	26446544
NF1	chr17	26507048	26507111
NF1	chr17	26507113	26507315
NF1	chr17	26510050	26510332
NF1	chr17	26514279	26514555
NF1	chr17	26520962	26521207
NF1	chr17	26532449	26532726
NF1	chr17	26532744	26532953
NF1	chr17	26532956	26533021
NF1	chr17	26533583	26533854
NF1	chr17	26551505	26551783
NF1	chr17	26552091	26552376
NF1	chr17	26552456	26552540
NF1	chr17	26552541	26552666
NF1	chr17	26557304	26557578
NF1	chr17	26565516	26565797
NF1	chr17	26570115	26570337
NF1	chr17	26572888	26573095
NF1	chr17	26574499	26574781
NF1	chr17	26576221	26576447
NF1	chr17	26577530	26577669
NF1	chr17	26577712	26577850
NF1	chr17	26578249	26578525
NF1	chr17	26578563	26578839
NF1	chr17	26580136	26580217
NF1	chr17	26580318	26580593
NF1	chr17	26580913	26581140
NF1	chr17	26581314	26581560
NF1	chr17	26581879	26582022
NF1	chr17	26582042	26582158
NF1	chr17	26583126	26583197
NF1	chr17	26583204	26583405
NF1	chr17	26583785	26584071
NF1	chr17	26584095	26584388
NF1	chr17	26586686	26586941
NF1	chr17	26586967	26587204
NF1	chr17	26600046	26600110
NF1	chr17	26600115	26600321
NF1	chr17	26603967	26604126
NF1	chr17	26604127	26604248
NF1	chr17	26609419	26609695
NF1	chr17	26610074	26610359
NF1	chr17	26611439	26611718
NF1	chr17	26612778	26613062
NF1	chr17	26616282	26616561
NF1	chr17	26676918	26677429
NF1	chr17	26678595	26679008
NF1	chr17	26681393	26681668
NF1	chr17	26685933	26686215
NF1	chr17	26687416	26687682
NF1	chr17	26687753	26688090
NF1	chr17	26688466	26688759
NF1	chr17	26688843	26689117
NF1	chr17	26689043	26689356
NF1	chr17	26689751	26690026
NF1	chr17	26691570	26691848
NF1	chr17	26694068	26694341
NF1	chr17	26700249	26700463
NF1	chr17	26701246	26701531
NF1	chr17	26703330	26703596
NF1	chr17	26707515	26707802
NF1	chr17	26708022	26708293
NF1	chr17	26708313	26708597
NF1	chr17	26709544	26709826
NF1	chr17	26709986	26710270
NF1	chr17	26711585	26711878
NF1	chr17	26725110	26726032
ERBB2	chr17	35109732	35110117
ERBB2	chr17	35116695	35116971
ERBB2	chr17	35118054	35118349
ERBB2	chr17	35119016	35119289
ERBB2	chr17	35119477	35119760
ERBB2	chr17	35119777	35120059
ERBB2	chr17	35120004	35120324
ERBB2	chr17	35121616	35121896
ERBB2	chr17	35122014	35122300
ERBB2	chr17	35124955	35125383
ERBB2	chr17	35125468	35125758
ERBB2	chr17	35125998	35126479
ERBB2	chr17	35129439	35129721
ERBB2	chr17	35133016	35133296
ERBB2	chr17	35133196	35133504
ERBB2	chr17	35133594	35133875
ERBB2	chr17	35134450	35134731
ERBB2	chr17	35134760	35135042
ERBB2	chr17	35134957	35135265
ERBB2	chr17	35135408	35135699
ERBB2	chr17	35136244	35136523
ERBB2	chr17	35136538	35136826
ERBB2	chr17	35137024	35137363
ERBB2	chr17	35137420	35138478
SOCS3	chr17	73864411	73864515
SOCS3	chr17	73864516	73864802
SOCS3	chr17	73864811	73866892
SOCS3	chr17	73867377	73867791
PTPRM	chr18	7557263	7557904
PTPRM	chr18	7764059	7764343
PTPRM	chr18	7878056	7878403
PTPRM	chr18	7896394	7896673
PTPRM	chr18	7916474	7916759
PTPRM	chr18	7939118	7939396
PTPRM	chr18	7945068	7945450
PTPRM	chr18	8059637	8060024
PTPRM	chr18	8066357	8066645
PTPRM	chr18	8075618	8075900
PTPRM	chr18	8078647	8078928
PTPRM	chr18	8103433	8103785
PTPRM	chr18	8104658	8104934
PTPRM	chr18	8133562	8133846
PTPRM	chr18	8233981	8234263
PTPRM	chr18	8237729	8238012
PTPRM	chr18	8237973	8238298
PTPRM	chr18	8242345	8242627
PTPRM	chr18	8243169	8243445
PTPRM	chr18	8286260	8286539
PTPRM	chr18	8304671	8304874
PTPRM	chr18	8309048	8309331
PTPRM	chr18	8333320	8333598
PTPRM	chr18	8360797	8361078
PTPRM	chr18	8365973	8366251
PTPRM	chr18	8366391	8366659
PTPRM	chr18	8368191	8368468
PTPRM	chr18	8369104	8369384
PTPRM	chr18	8370214	8370491
PTPRM	chr18	8374471	8374748
PTPRM	chr18	8377003	8377285
PTPRM	chr18	8384391	8384667
PTPRM	chr18	8396057	8396891
PTPN2	chr18	12775435	12775874
PTPN2	chr18	12783197	12783541
PTPN2	chr18	12783554	12784510
PTPN2	chr18	12791919	12792192
PTPN2	chr18	12804130	12804410
PTPN2	chr18	12807109	12807399
PTPN2	chr18	12815729	12816004
PTPN2	chr18	12820840	12821125
PTPN2	chr18	12826692	12826972
PTPN2	chr18	12849058	12849344
PTPN2	chr18	12874026	12874364
STK11	chr19	1156749	1157804
STK11	chr19	1157807	1158235
STK11	chr19	1169310	1169587
STK11	chr19	1170219	1170503
STK11	chr19	1171291	1171570
STK11	chr19	1171472	1171782
STK11	chr19	1172128	1172406
STK11	chr19	1172829	1173107
STK11	chr19	1173927	1174215
STK11	chr19	1177407	1177687
STK11	chr19	1178544	1179047
STK11	chr19	1179065	1179463
TYK2	chr19	10322155	10322667
TYK2	chr19	10322608	10322891
TYK2	chr19	10324038	10324295
TYK2	chr19	10324537	10324821
TYK2	chr19	10325113	10325388
TYK2	chr19	10325663	10325949
TYK2	chr19	10326086	10326358
TYK2	chr19	10328173	10328448
TYK2	chr19	10329368	10329607
TYK2	chr19	10329596	10329878
TYK2	chr19	10330793	10331047
TYK2	chr19	10333080	10333359
TYK2	chr19	10333391	10333674
TYK2	chr19	10333628	10333935
TYK2	chr19	10333859	10334173
TYK2	chr19	10334095	10334411
TYK2	chr19	10336223	10336506
TYK2	chr19	10336443	10336749
TYK2	chr19	10337147	10337609
TYK2	chr19	10338028	10338312
TYK2	chr19	10339659	10339940
TYK2	chr19	10339845	10340164
TYK2	chr19	10349844	10350133
TYK2	chr19	10351224	10351510
TYK2	chr19	10352006	10352277
JAK3	chr19	17796547	17797440
JAK3	chr19	17797722	17797790
JAK3	chr19	17798222	17798756
JAK3	chr19	17801821	17802100
JAK3	chr19	17802220	17802502
JAK3	chr19	17802974	17803255
JAK3	chr19	17803395	17803669
JAK3	chr19	17804277	17804551
JAK3	chr19	17804482	17804802
JAK3	chr19	17806309	17806584
JAK3	chr19	17806554	17806872
JAK3	chr19	17806777	17807088
JAK3	chr19	17807646	17807927
JAK3	chr19	17808831	17809114
JAK3	chr19	17809661	17809940
JAK3	chr19	17809990	17810264
JAK3	chr19	17811231	17811513
JAK3	chr19	17811944	17812221
JAK3	chr19	17813131	17813405
JAK3	chr19	17813330	17813639
JAK3	chr19	17814079	17814455
JAK3	chr19	17814759	17815042
JAK3	chr19	17815098	17815370
JAK3	chr19	17815497	17815781
JAK3	chr19	17815994	17816267
JAK3	chr19	17819649	17819931
CEBPA	chr19	38482631	38485305
SPRED3	chr19	43572723	43572996
SPRED3	chr19	43574360	43574651
SPRED3	chr19	43574539	43574714
SPRED3	chr19	43574719	43574856
SPRED3	chr19	43576751	43577026
SPRED3	chr19	43577047	43577328
SPRED3	chr19	43577911	43578738
AKT2	chr19	45431250	45431730
AKT2	chr19	45432695	45432978
AKT2	chr19	45432876	45433190
AKT2	chr19	45433590	45433886
AKT2	chr19	45433918	45434202
AKT2	chr19	45435631	45435907
AKT2	chr19	45436540	45436816
AKT2	chr19	45437677	45437957
AKT2	chr19	45439602	45439885
AKT2	chr19	45440212	45440488
AKT2	chr19	45452811	45453093
AKT2	chr19	45454590	45454831
AKT2	chr19	45462888	45463167
AKT2	chr19	45482870	45483139
AXL	chr19	46416901	46417254
AXL	chr19	46418335	46418639
AXL	chr19	46418790	46419078
AXL	chr19	46419566	46419837
AXL	chr19	46428605	46428883
AXL	chr19	46428806	46429117
AXL	chr19	46435638	46435927
AXL	chr19	46436139	46436412
AXL	chr19	46436836	46437121
AXL	chr19	46437306	46437593
AXL	chr19	46440545	46440832
AXL	chr19	46441260	46441534
AXL	chr19	46446157	46446444
AXL	chr19	46446339	46446656
AXL	chr19	46450016	46450277
AXL	chr19	46450501	46450788
AXL	chr19	46451253	46451527
AXL	chr19	46454131	46454416
AXL	chr19	46455155	46455435
AXL	chr19	46457252	46458051
AXL	chr19	46458342	46459547
PTPRT	chr20	40141950	40143017
PTPRT	chr20	40143856	40144129
PTPRT	chr20	40146670	40146957
PTPRT	chr20	40147699	40147980
PTPRT	chr20	40160390	40160677
PTPRT	chr20	40164119	40164392
PTPRT	chr20	40166552	40166832
PTPRT	chr20	40168758	40169029
PTPRT	chr20	40172358	40172603
PTPRT	chr20	40177160	40177389
PTPRT	chr20	40180355	40180642
PTPRT	chr20	40181861	40182137
PTPRT	chr20	40190696	40190968
PTPRT	chr20	40203866	40204145
PTPRT	chr20	40223355	40223632
PTPRT	chr20	40261222	40261503
PTPRT	chr20	40298147	40298426
PTPRT	chr20	40310659	40310930
PTPRT	chr20	40332338	40332618
PTPRT	chr20	40344410	40344663
PTPRT	chr20	40377730	40378087
PTPRT	chr20	40412587	40412870
PTPRT	chr20	40414088	40414366
PTPRT	chr20	40510179	40510463
PTPRT	chr20	40534271	40534651
PTPRT	chr20	40739904	40740252
PTPRT	chr20	40818455	40818744
PTPRT	chr20	40833399	40833685
PTPRT	chr20	40842166	40842447
PTPRT	chr20	40853202	40853551
PTPRT	chr20	40947776	40948056
PTPRT	chr20	41251652	41252004
PTPN1	chr20	48560252	48560566
PTPN1	chr20	48611206	48611487
PTPN1	chr20	48614812	48615086
PTPN1	chr20	48618227	48618508
PTPN1	chr20	48624379	48624661
PTPN1	chr20	48628314	48628600
PTPN1	chr20	48629043	48629327
PTPN1	chr20	48629596	48629905
PTPN1	chr20	48631159	48631434
PTPN1	chr20	48632587	48634502
RUNX1	chr21	35084951	35085608
RUNX1	chr21	35085619	35086808
RUNX1	chr21	35093403	35093681
RUNX1	chr21	35115394	35115897
RUNX1	chr21	35128526	35128803
RUNX1	chr21	35153545	35153830
RUNX1	chr21	35174656	35174938
RUNX1	chr21	35180964	35181300
RUNX1	chr21	35186961	35187199
RUNX1	chr21	35342921	35343198
RUNX1	chr21	35343289	35343530
SMARCB1	chr22	22459103	22459479
SMARCB1	chr22	22463863	22464142
SMARCB1	chr22	22465662	22465946
SMARCB1	chr22	22473049	22473325
SMARCB1	chr22	22475399	22475674
SMARCB1	chr22	22488891	22489168
SMARCB1	chr22	22497361	22497639
SMARCB1	chr22	22505677	22505959
SMARCB1	chr22	22506280	22506739
NF2	chr22	28329494	28330136
NF2	chr22	28362657	28362921
NF2	chr22	28364989	28365262
NF2	chr22	28368087	28368358
NF2	chr22	28380531	28380817
NF2	chr22	28381478	28381713
NF2	chr22	28384070	28384348
NF2	chr22	28387115	28387398
NF2	chr22	28390868	28391139
NF2	chr22	28394231	28394505
NF2	chr22	28397728	28398008
NF2	chr22	28399211	28399508
NF2	chr22	28400731	28401006
NF2	chr22	28404103	28404384
NF2	chr22	28407363	28407643
NF2	chr22	28408885	28409165
NF2	chr22	28420691	28421718
